# Supplementary material for: A Skeletal Muscle Model of Infantile-onset Pompe Disease with Patient-specific iPS Cells
Source: PubMed Central journal article supplement (PMC5647434; doi:10.1038/s41598-017-14063-y), 2017-10-18
Supplement: 41598_2017_14063_MOESM1_ESM.pdf [file 41598_2017_14063_MOESM1_ESM.pdf]

## Supplementary Information

### **A Skeletal Muscle Model of Infantile-onset Pompe Disease with Patient-specific iPS Cells**

Takeshi Yoshida,<sup>1,2</sup> Tomonari Awaya,<sup>2,3</sup> Tatsuya Jonouchi,<sup>1</sup> Ryo Kimura,<sup>3</sup> Shigemi Kimura,<sup>4</sup> Takumi Era,<sup>5</sup> Toshio Heike,<sup>2</sup> Hidetoshi Sakurai<sup>1,\*</sup>

<sup>1</sup>Center for iPS Cell Research and Application (CiRA), Kyoto University, Kyoto 606-8507, Japan

<sup>2</sup>Department of Pediatrics, Kyoto University Graduate School of Medicine, Kyoto 606-8507, Japan

<sup>3</sup>Department of Anatomy and Developmental Biology, Kyoto University Graduate School of Medicine, Kyoto 606-8501, Japan

<sup>4</sup>Kumamoto City Child Development Support Center, Kumamoto 862-0971, Japan

<sup>5</sup>Department of Cell Modulation, Institute of Molecular Embryology and Genetics (IMEG), Kumamoto University, Kumamoto 860-8556, Japan

\*Correspondence: Hidetoshi Sakurai, M.D., Ph.D., Center for iPS Cell Research and Application (CiRA), Kyoto University, 53 Shogoin Kawahara-cho, Sakyo-ku, Kyoto 606-8507, Japan. Telephone: 81-75-751-3301; E-Mail: [hsakurai@cira.kyoto-u.ac.jp](mailto:hsakurai@cira.kyoto-u.ac.jp)

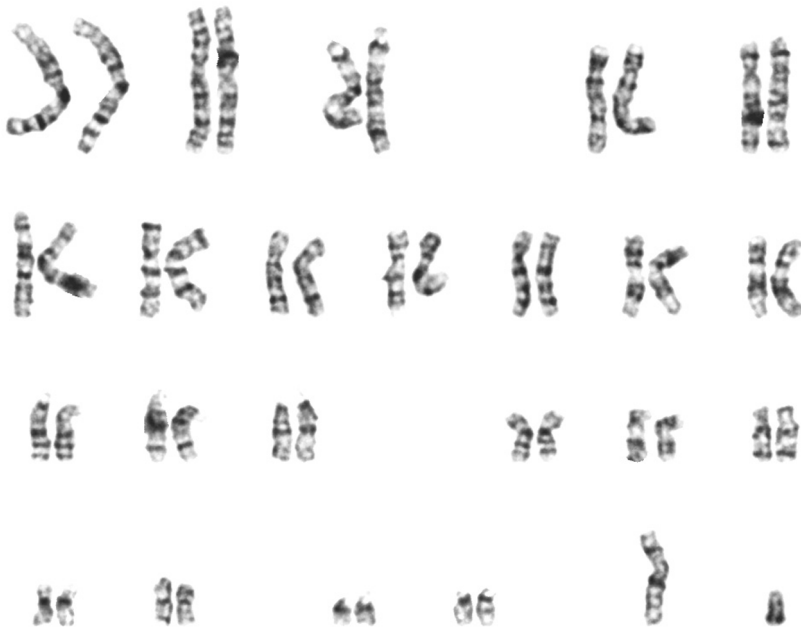

**Supplementary Figure S1. Karyotype analysis by G-banding.**

A representative image of G-banding in Pom1 iPSC line.

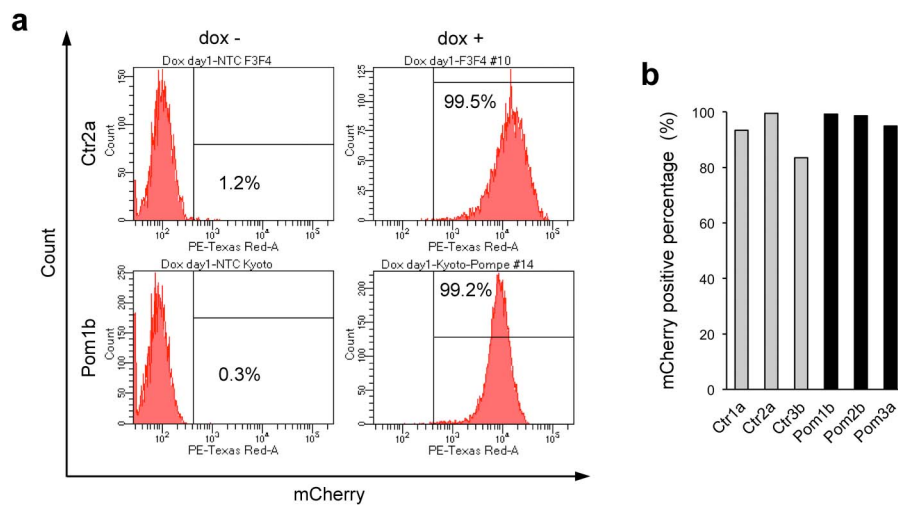

**Supplementary Figure S2. Efficient transfection of *MyoD* into iPS Cells.**

(a) Representative images of flow cytometric analysis for tetracycline-mediated mCherry expression at day 2 of myogenic differentiation. (b) Percentage of mCherry positive cells analyzed by flow cytometry at day 2 of myogenic differentiation with doxycycline.

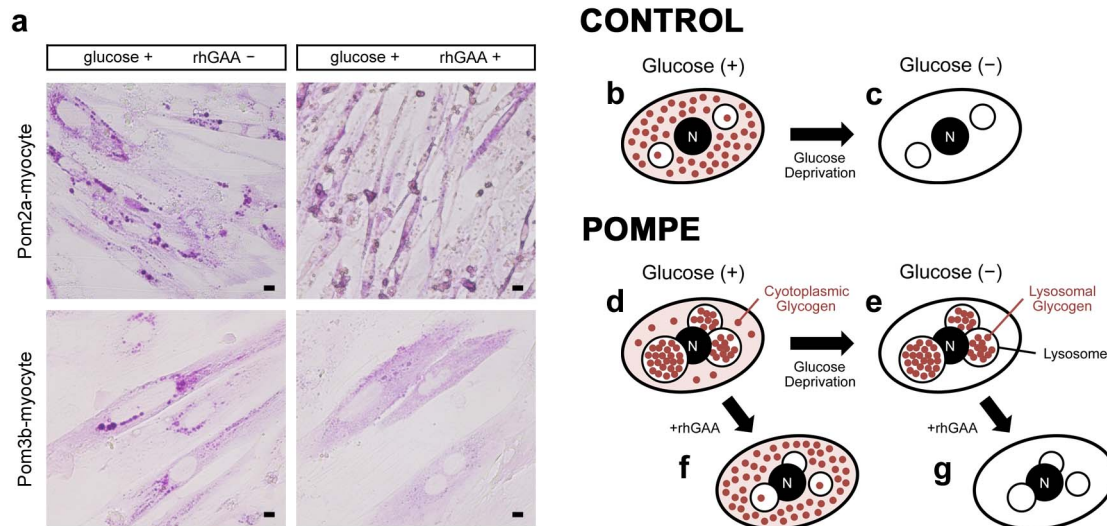

**Supplemental Figure S3. Improvement of the lysosomal glycogen accumulation by rhGAA rescue in glucose-rich conditions.**

(a) Bright field microscopic images of periodic acid-Schiff stain in representative Pom iPSC<sup>MyoD</sup>-derived myocytes cultured in glucose-containing medium without rhGAA (left row) or treated for 3 days with rhGAA (right row). Scale bars = 10  $\mu$ m. (b-g) Schematic overview of the glycogen state before and after glucose deprivation. Almost all the glycogen is detected in the cytoplasm in Ctr iPSC<sup>MyoD</sup>-derived myocytes (b) and is consumed after glucose deprivation (c). In the case of Pom iPSC<sup>MyoD</sup>-derived myocytes, accumulated lysosomal glycogen remains undegraded after glucose deprivation due to the lack of GAA (e). rhGAA degrades lysosomal glycogen into glucose; and the yielded glucose is released into the cytoplasm, where it is used to synthesize glycogen in glucose-rich conditions (f), or consumed in glucose-free conditions (g). A capital letter “N” represents a nucleus.

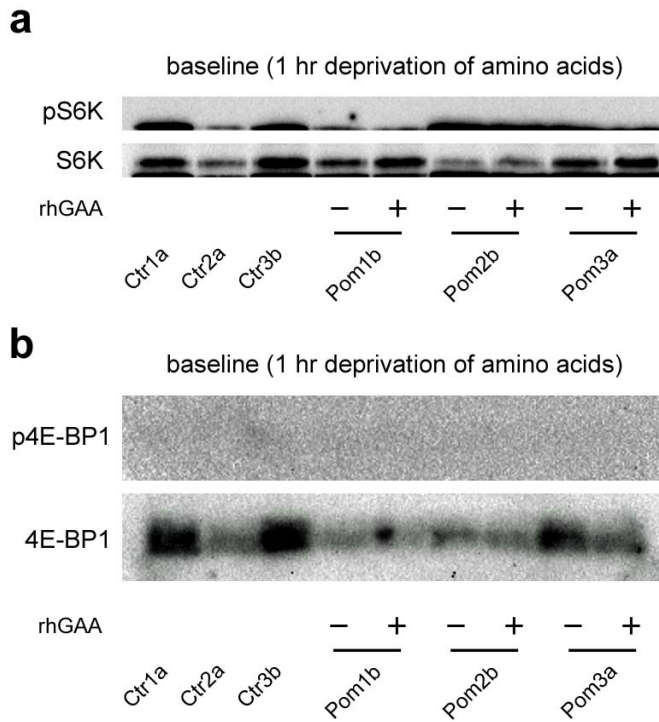

**Supplemental Figure S4. S6K and 4E-BP1 are little phosphorylated before stimulation with amino acids and insulin.**

Western blot analyses for pS6K and total S6K (**a**) and p4E-BP1 and total 4E-BP1 (**b**) after 1 hr deprivation of amino acids as a baseline in protein extracts from iPSC<sup>MyoD</sup>-derived myocytes. Pom iPSC<sup>MyoD</sup>-derived myocytes were treated with or without rhGAA.

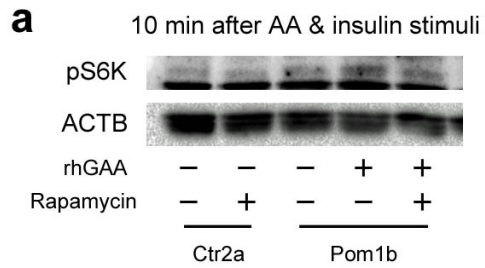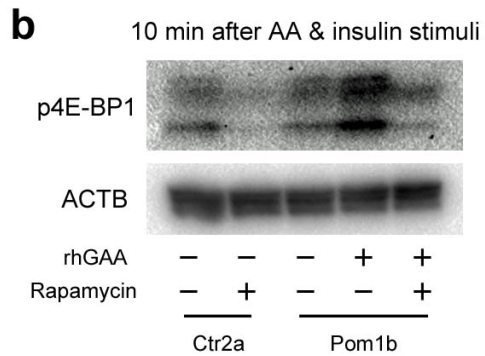

**Supplemental Figure S5. Rapamycin pretreatment suppressed phosphorylation of S6K and 4E-BP1 by simulation with amino acids (AA) and insulin.**

Western blot analyses for pS6K (A) and p4E-BP1 (B) after 10 min exposure to AA and insulin in protein extracts from iPSC<sup>MyoD</sup>-derived myocytes. Myocytes were pretreated with 200 nM Rapamycin for 1 h ahead of stimulation. Pom iPSC<sup>MyoD</sup>-derived myocytes were treated with or without rhGAA. Full-length membranes were presented below.

| PCR Type | Name            | FW/RV | Sequence (5'-3')           |
|----------|-----------------|-------|----------------------------|
| RT-PCR   | <i>Oct3/4</i>   | FW    | GACAGGGGGAGGGGAGGAGCTAGG   |
|          |                 | RV    | CTTCCCTCCAACCAGTTGCCCAAAC  |
|          | <i>Nanog</i>    | FW    | CAGCCCCGATTCTTCCACCAGTCCC  |
|          |                 | RV    | CGGAAGATTCCCAGTCGGGTTCCACC |
|          | <i>ACTB</i>     | FW    | CTCTTCCAGCCTTCCTTCCT       |
|          |                 | RV    | CACCTTCACCGTTCCAGTTT       |
| q-RT-PCR | <i>Myogenin</i> | FW    | TGGGCGTGTAAGGTGTGTAA       |
|          |                 | RV    | CGATGTACTGGATGGCACTG       |
|          | <i>MHC</i>      | FW    | GCAGATTGAGCTGGAAAAGG       |
|          |                 | RV    | TCAGCTGCTCGATCTCTTCA       |
|          | <i>CKM</i>      | FW    | ACATGGCCAAGGTACTGACC       |
|          |                 | RV    | TGATGGGGTCAAAGAGTTCC       |
|          | <i>UBQ-C</i>    | FW    | GTAGTCCCTTCTCGGCGATT       |
|          |                 | RV    | TTGTCAAGTGACGATCACAGC      |

**Supplemental Table S1. Primers for RT-PCR and q-RT-PCR analysis.**

Abbreviations: q-RT-PCR, quantitative RT-PCR; FW, forward primer; RV, reverse primer; *ACTB*, beta-actin; *MHC*, myosin heavy chain; *CKM*, creatine kinase M-type; *UBQ-C*, ubiquitin-c.

## Primary Antibody

|          | Dilution | Experiment | Company                                     |
|----------|----------|------------|---------------------------------------------|
| SSEA4    | 1:100    | IF         | Merck Millipore, Billerica, MA, USA         |
| TRA-1-60 | 1:100    | IF         | Merck Millipore, Billerica, MA, USA         |
| TRA-1-81 | 1:100    | IF         | Merck Millipore, Billerica, MA, USA         |
| LAMP2    | 1:100    | IF         | BD Biosciences, San Diego, CA, USA          |
| MHC      | 1:200    | IF         | R&D Systems, Minneapolis, MN, USA           |
| LC3      | 1:400    | IF, WB     | Sigma-Aldrich, St. Louis, MO, USA           |
| pS6K     | 1:1000   | WB         | Cell Signaling Technology, Danvers, MA, USA |
| S6K      | 1:1000   | WB         | Cell Signaling Technology, Danvers, MA, USA |
| p4E-BP1  | 1:1000   | WB         | Cell Signaling Technology, Danvers, MA, USA |
| 4E-BP1   | 1:1000   | WB         | Cell Signaling Technology, Danvers, MA, USA |
| HRP-ACTB | 1:20000  | WB         | Sigma-Aldrich, St. Louis, MO, USA           |

## Secondary Antibody

|                                      | Dilution | Experiment | Company                                    |
|--------------------------------------|----------|------------|--------------------------------------------|
| Alexa Fluor 488 goat anti-mouse IgG  | 1:500    | IF         | Thermo Fisher Scientific, Waltham, MA, USA |
| Alexa Fluor 488 goat anti-rabbit IgG | 1:500    | IF         | Thermo Fisher Scientific, Waltham, MA, USA |
| HRP goat anti-rabbit IgG             | 1:10000  | WB         | Vector Laboratories, Burlingame, CA, USA   |

### Supplemental Table S2. Primary and secondary antibodies used in this study.

Abbreviations: SSEA4, stage specific embryonic antigen 4; TRA, tumor-related antigen; LAMP2, lysosome-associated membrane protein 2; MHC, myosin heavy chain; LC3, microtubule-associated protein 1 light chain 3; S6K, p70 ribosomal S6 kinase; pS6K, phosphorylated S6K; 4E-BP1, eukaryotic initiation factor 4E-binding protein 1; p4E-BP1, phosphorylated 4E-BP1; HRP, horseradish peroxidase; ACTB, beta-actin; IF, immunofluorescence; WB, western blot.



| Compound name                     | KEGG ID              | HMDB ID              | Ctr2a     |          | Pom1b     |          | Pom1b + rhGAA |          |
|-----------------------------------|----------------------|----------------------|-----------|----------|-----------|----------|---------------|----------|
|                                   |                      |                      | Mean      | S.D.     | Mean      | S.D.     | Mean          | S.D.     |
| NAD <sup>+</sup>                  | C00003               | HMDB00902            | 1,457.12  | 293.67   | 1,317.16  | 137.19   | 2,088.31      | 30.47    |
| cAMP                              | C00575               | HMDB00058            | 4.93      | 1.59     | 7.69      | 2.42     | 10.29         | 0.76     |
| cGMP                              | C00942               | HMDB01314            | N.D.      |          | N.D.      |          | N.D.          |          |
| NADH                              | C00004               | HMDB01487            | 99.48     | 23.65    | 133.29    | 29.35    | 187.86        | 25.09    |
| Xanthine                          | C00385               | HMDB00292            | N.D.      | N.D.     | N.D.      | N.D.     | N.D.          | N.D.     |
| ADP-ribose                        | C00301               | HMDB01178            | 3.11      | 0.58     | 2.92      | 0.92     | 4.03          | 0.23     |
| Mevalonic acid                    | C00418,C02104        | HMDB00227            | N.D.      | N.D.     | N.D.      | N.D.     | N.D.          | N.D.     |
| UDP-glucose                       | C00029               | HMDB00286            | 1,775.77  | 370.69   | 1,092.08  | 33.40    | 1,805.70      | 124.43   |
| Uric acid                         | C00366               | HMDB00289            | N.D.      |          | N.D.      |          | N.D.          |          |
| NADP <sup>+</sup>                 | C00006               | HMDB00217            | 26.95     | 3.95     | 26.38     | 1.47     | 39.59         | 3.99     |
| IMP                               | C00130               | HMDB00175            | 15.37     | 2.38     | 38.18     | 15.16    | 40.42         | 2.49     |
| Sedoheptulose 7-phosphate         | C05382               | HMDB01068            | N.D.      |          | N.D.      |          | N.D.          |          |
| Glucose 6-phosphate               | C00668,C01172,C00092 | HMDB01401            | 405.90    | 145.08   | 204.14    | 34.69    | 270.59        | 20.54    |
| Fructose 6-phosphate              | C05345,C00085        | HMDB00124            | 80.67     | 28.06    | 38.07     | 3.18     | 46.42         | 1.20     |
| Fructose 1-phosphate              | C01094,C02976        | HMDB01076            | N.D.      |          | 100.56    | 100.07   | 50.01         | 15.87    |
| Galactose 1-phosphate             | C00446               | HMDB00645            | 14.23     | 1.85     | 12.91     | 4.07     | 17.12         | 2.14     |
| Glucose 1-phosphate               | C00103               | HMDB01586            | 40.94     | 13.84    | 48.79     | 14.83    | 66.78         | 6.66     |
| Acetoacetyl CoA                   | C00332               | HMDB01484            | N.D.      |          | N.D.      |          | N.D.          |          |
| Acetyl CoA                        | C00024               | HMDB01206            | 1.33      | 0.75     | 0.35      | 0.28     | 0.50          | 0.26     |
| Folic acid                        | C00504               | HMDB00121            | 7.96      | 2.42     | 5.99      | 3.10     | 8.46          | 0.89     |
| Ribose 5-phosphate                | C00117               | HMDB01548            | 29.48     | 11.47    | 17.61     | 2.10     | 18.59         | 2.86     |
| CoA                               | C00010               | HMDB01423            | 20.35     | 7.97     | 18.49     | 3.17     | 35.95         | 9.23     |
| Ribose 1-phosphate                | C00620               | HMDB01489            | 2.42      | 4.20     | 11.08     | 7.95     | 14.38         | 1.61     |
| Ribulose 5-phosphate              | C00199,C01101        | HMDB00618            | 32.65     | 11.74    | 14.33     | 6.09     | 26.97         | 6.89     |
| Xylulose 5-phosphate              | C00231,C03291        | HMDB00868            | 34.35     | 19.84    | 10.98     | 12.25    | 12.74         | 11.33    |
| Erythrose 4-phosphate             | C00279,C03604        | HMDB01321            | N.D.      |          | N.D.      |          | N.D.          |          |
| HMG CoA                           | C00356               | HMDB01375            | 6.72      | 2.56     | 12.36     | 4.94     | 25.16         | 8.73     |
| Glyceraldehyde 3-phosphate        | C00118,C00661        | HMDB01112            | 161.72    | 20.52    | 109.81    | 9.53     | 102.11        | 3.40     |
| NADPH                             | C00005               | HMDB00221            | 44.88     | 12.68    | 39.65     | 2.47     | 65.37         | 14.24    |
| Malonyl CoA                       | C00083               | HMDB01175            | N.D.      |          | N.D.      |          | N.D.          |          |
| Phosphocreatine                   | C02305               | HMDB01511            | 3,585.54  | 539.23   | 2,087.83  | 245.76   | 4,058.10      | 49.80    |
| XMP                               | C00655               | HMDB01554            | 4.59      | 2.20     | 5.23      | 0.94     | 7.17          | 1.06     |
| Dihydroxyacetone phosphate (DHAP) | C00111               | HMDB01473            | 554.01    | 63.29    | 492.22    | 93.58    | 560.78        | 60.16    |
| Adenylosuccinic acid              | C03794               | HMDB00536            | 2.37      | 0.18     | 2.95      | 0.59     | 3.86          | 0.30     |
| Fructose 1,6-diphosphate          | C00354               | HMDB01058            | 1,379.31  | 400.05   | 1,161.43  | 344.19   | 1,935.49      | 159.51   |
| 6-Phosphogluconic acid            | C00345               | HMDB01316            | 18.69     | 2.14     | 19.70     | 5.50     | 25.74         | 1.62     |
| N-Carbamoylaspartic acid          | C00438               | HMDB00828            | 23.28     | 8.02     | 219.20    | 104.39   | 195.47        | 37.69    |
| PRPP                              | C00119               | HMDB00280            | 48.59     | 18.37    | 53.98     | 8.27     | 88.24         | 12.97    |
| 2-Phosphoglyceric acid            | C00631               | HMDB03391            | 9.58      | 2.20     | 13.35     | 2.51     | 21.83         | 0.34     |
| 2,3-Diphosphoglyceric acid        | C01159               | HMDB01294            | 63.96     | 24.65    | 70.54     | 18.85    | 116.62        | 8.50     |
| 3-Phosphoglyceric acid            | C00197               | HMDB00807            | 70.32     | 14.10    | 102.29    | 15.35    | 160.45        | 10.20    |
| Phosphoenolpyruvic acid           | C00074               | HMDB00263            | N.D.      |          | N.D.      |          | N.D.          |          |
| GMP                               | C00144               | HMDB01397            | 41.99     | 13.11    | 88.09     | 8.19     | 114.34        | 3.45     |
| AMP                               | C00020               | HMDB00045            | 203.75    | 85.81    | 486.68    | 22.98    | 594.01        | 13.21    |
| 2-Oxoisovaleric acid              | C00141               | HMDB00019            | N.D.      |          | N.D.      |          | N.D.          |          |
| GDP                               | C00035               | HMDB01201            | 122.64    | 32.66    | 189.24    | 17.41    | 228.65        | 20.09    |
| Lactic acid                       | C00186,C00256,C01432 | HMDB00190, HMDB01311 | 11,315.48 | 1,626.74 | 17,006.39 | 2,466.63 | 22,933.36     | 1,120.08 |
| ADP                               | C00008               | HMDB01341            | 872.90    | 281.54   | 1,438.63  | 87.38    | 1,582.93      | 204.78   |
| GTP                               | C00044               | HMDB01273            | 1,506.78  | 307.18   | 1,392.41  | 206.62   | 2,237.59      | 165.85   |
| Glyoxylate                        | C00048               | HMDB00119            | N.D.      |          | N.D.      |          | N.D.          |          |
| ATP                               | C00002               | HMDB00538            | 10,253.92 | 1,997.54 | 8,814.10  | 690.50   | 14,797.53     | 1,192.35 |
| Glycerol 3-phosphate              | C00093               | HMDB00126            | 2,431.30  | 214.13   | 3,499.16  | 2,241.69 | 3,116.69      | 200.17   |
| Glycolic acid                     | C00160               | HMDB00115            | 29.74     | 51.52    | N.D.      |          | N.D.          |          |
| Pyruvic acid                      | C00022               | HMDB00243            | 83.65     | 74.52    | 38.02     | 65.85    | 118.20        | 33.02    |
| N-Acetylglutamic acid             | C00624               | HMDB01138            | 51.67     | 3.34     | 122.04    | 45.42    | 155.45        | 9.82     |
| 2-Hydroxyglutaric acid            | C02630,C01087,C03196 | HMDB00606, HMDB00694 | 15.33     | 6.37     | 49.00     | 22.08    | 60.48         | 7.18     |
| Carbamoylphosphate                | C00169               | HMDB01096            | N.D.      |          | N.D.      |          | 2.92          | 5.05     |
| Succinic acid                     | C00042               | HMDB00254            | 173.04    | 40.61    | 1,498.64  | 1,068.73 | 1,126.59      | 126.74   |
| Malic acid                        | C00149,C00497,C00711 | HMDB00156, HMDB00744 | 500.70    | 18.20    | 636.48    | 166.18   | 1,444.96      | 179.99   |
| 2-Oxoglutaric acid                | C00026               | HMDB00208            | N.D.      |          | N.D.      |          | 21.22         | 17.53    |
| Fumaric acid                      | C00122               | HMDB00134            | 76.94     | 0.96     | 94.99     | 6.62     | 227.43        | 60.55    |
| Citric acid                       | C00158               | HMDB00094            | 153.68    | 109.28   | 191.03    | 163.41   | 435.54        | 16.86    |
| cis-Aconitic acid                 | C00417               | HMDB00072            | N.D.      |          | N.D.      |          | 1.50          | 1.58     |
| Isocitric acid                    | C00311               | HMDB00193            | N.D.      |          | N.D.      |          | N.D.          |          |
| Urea                              | C00086               | HMDB00294            | N.D.      |          | N.D.      |          | N.D.          |          |
| Glycine                           | C00037               | HMDB00123            | 19,540.39 | 3,711.80 | 28,716.95 | 3,874.23 | 39,474.56     | 1,286.94 |
| Putrescine                        | C00134               | HMDB01414            | 87.44     | 4.87     | 239.90    | 79.43    | 317.88        | 40.34    |
| β-Alanine                         | C00099               | HMDB00056            | 488.69    | 177.31   | 367.42    | 61.22    | 529.43        | 19.77    |
| Alanine                           | C00041,C00133,C01401 | HMDB00161, HMDB01310 | 10,959.01 | 3,642.72 | 9,939.60  | 1,896.07 | 16,839.36     | 416.64   |
| Sarcosine                         | C00213               | HMDB00271            | N.D.      |          | N.D.      |          | N.D.          |          |
| N,N-Dimethylglycine               | C01026               | HMDB00092            | N.D.      |          | N.D.      |          | N.D.          |          |
| γ-Aminobutyric acid               | C00334               | HMDB00112            | 84.38     | 9.85     | 86.28     | 10.98    | 116.53        | 8.87     |
| Choline                           | C00114               | HMDB00097            | 643.68    | 188.20   | 392.17    | 399.39   | 235.49        | 33.73    |
| Serine                            | C00065,C00716,C00740 | HMDB00187, HMDB03406 | 13,986.61 | 749.00   | 14,559.97 | 1,893.87 | 19,705.15     | 1,471.59 |
| Carnosine                         | C00386               | HMDB00033            | 2.77      | 4.81     | 8.74      | 7.57     | 5.95          | 10.31    |
| Creatinine                        | C00791               | HMDB00562            | 14.13     | 9.25     | 9.12      | 0.36     | 18.28         | 2.92     |
| Proline                           | C00148,C00763,C16435 | HMDB00162, HMDB03411 | 26,693.64 | 2,513.27 | 44,157.28 | 6,043.59 | 59,177.43     | 3,972.01 |
| Valine                            | C00183,C06417,C16436 | HMDB00883            | 11,167.30 | 848.56   | 12,994.75 | 1,959.25 | 15,467.84     | 1,524.91 |

|                                        |                      |                     |            |           |            |           |            |           |
|----------------------------------------|----------------------|---------------------|------------|-----------|------------|-----------|------------|-----------|
| Betaine                                | C00719               | HMDB00043           | N.D.       |           | N.D.       |           | N.D.       |           |
| Threonine                              | C00188,C00820        | HMDB00167           | 19,328.41  | 1,181.19  | 21,934.41  | 2,584.70  | 28,817.90  | 2,323.58  |
| Homoserine                             | C00263               | HMDB00719           | N.D.       |           | N.D.       |           | N.D.       |           |
| Betaine aldehyde                       | C00576               | HMDB01252           | N.D.       |           | N.D.       |           | N.D.       |           |
| Cysteine                               | C00097,C00736,C00793 | HMDB00574,HMDB03417 | 179.55     | 42.89     | 139.38     | 26.38     | 202.19     | 15.19     |
| Hydroxyproline                         | C01015,C01157        | HMDB06055,HMDB00725 | 684.87     | 27.43     | 776.61     | 127.65    | 997.84     | 164.94    |
| Creatine                               | C00300               | HMDB00064           | 11,982.78  | 2,108.85  | 11,445.92  | 2,313.93  | 16,550.11  | 960.09    |
| Isoleucine                             | C00407,C06418,C16434 | HMDB00172           | 12,437.52  | 1,162.30  | 14,416.51  | 1,765.52  | 17,356.16  | 1,546.98  |
| Leucine                                | C00123,C01570,C16439 | HMDB00687           | 4,622.43   | 585.57    | 5,533.56   | 986.31    | 6,722.52   | 731.80    |
| Asparagine                             | C00152,C01905,C16438 | HMDB00168           | 923.67     | 248.75    | 788.55     | 121.89    | 1,203.71   | 66.88     |
| Ornithine                              | C00077,C00515,C01602 | HMDB00214,HMDB03374 | 142.27     | 10.99     | 296.90     | 100.00    | 407.60     | 33.50     |
| Aspartic acid (Asp)                    | C00049,C00402,C16433 | HMDB00191,HMDB06483 | 12,446.19  | 3,606.89  | 5,897.66   | 1,311.39  | 9,543.54   | 282.74    |
| Homocysteine                           | C00155,C05330        | HMDB00742           | N.D.       |           | N.D.       |           | N.D.       |           |
| Adenine                                | C00147               | HMDB00034           | N.D.       |           | N.D.       |           | N.D.       |           |
| Hypoxanthine                           | C00262               | HMDB00157           | N.D.       |           | N.D.       |           | N.D.       |           |
| Spermidine                             | C00315               | HMDB01257           | N.D.       |           | N.D.       |           | N.D.       |           |
| Glutamine                              | C00064,C00303,C00819 | HMDB00641,HMDB03423 | 50,769.51  | 7,572.15  | 60,020.18  | 6,800.80  | 78,862.45  | 2,306.08  |
| Lysine                                 | C00047,C00739,C16440 | HMDB00182,HMDB03405 | 2,296.70   | 415.13    | 3,388.17   | 862.41    | 4,127.13   | 518.42    |
| Glutamic acid (Glu)                    | C00025,C00217,C00302 | HMDB00148,HMDB03339 | 87,264.24  | 13,548.16 | 86,693.07  | 14,755.72 | 112,920.73 | 5,024.84  |
| Methionine                             | C00073,C00855,C01733 | HMDB00696           | 1,578.47   | 214.60    | 2,030.11   | 202.53    | 2,369.59   | 80.33     |
| Guanine                                | C00242               | HMDB00132           | N.D.       |           | N.D.       |           | N.D.       |           |
| Histidine                              | C00135,C00768,C06419 | HMDB00177           | 2,439.60   | 204.25    | 2,998.41   | 482.80    | 3,903.76   | 327.94    |
| Carnitine                              | C00318,C00487,C15025 | HMDB00062           | N.D.       |           | N.D.       |           | N.D.       |           |
| Phenylalanine                          | C00079,C02057,C02265 | HMDB00159           | 5,594.95   | 614.86    | 6,798.25   | 834.42    | 8,009.80   | 1,020.37  |
| Arginine                               | C00062,C00792        | HMDB00517,HMDB03416 | 963.68     | 186.05    | 1,390.36   | 323.52    | 1,668.22   | 302.12    |
| Citrulline                             | C00327               | HMDB00904           | N.D.       |           | N.D.       |           | N.D.       |           |
| Tyrosine                               | C00082,C01536,C06420 | HMDB00158           | 2,309.41   | 334.14    | 2,792.52   | 463.24    | 3,328.27   | 372.19    |
| S-Adenosylhomocysteine                 | C00021               | HMDB00939           | N.D.       |           | 13.48      | 23.35     | N.D.       |           |
| Spermine                               | C00750               | HMDB01256           | N.D.       |           | N.D.       |           | N.D.       |           |
| Tryptophan                             | C00078,C00525,C00806 | HMDB00929           | 1,212.07   | 169.82    | 1,441.05   | 190.12    | 1,715.64   | 164.17    |
| Cystathionine                          | C00542,C02291        | HMDB00099           | 1,957.02   | 709.58    | 5,495.49   | 921.50    | 9,027.93   | 147.16    |
| Adenosine                              | C00212               | HMDB00050           | N.D.       |           | 15.15      | 26.23     | N.D.       |           |
| Inosine                                | C00294               | HMDB00195           | N.D.       |           | N.D.       |           | N.D.       |           |
| Guanosine                              | C00387               | HMDB00133           | N.D.       |           | 9.94       | 17.21     | N.D.       |           |
| Argininosuccinic acid                  | C03406               | HMDB00052           | N.D.       |           | N.D.       |           | 29.46      | 25.83     |
| Glutathione (GSSG)                     | C00127               | HMDB03337           | 6,555.05   | 1,628.70  | 5,002.19   | 1,081.33  | 6,282.12   | 736.80    |
| Glutathione (GSH)                      | C00051               | HMDB00125           | 12,908.79  | 1,880.63  | 11,375.36  | 3,294.00  | 17,615.37  | 755.14    |
| S-Adenosylmethionine                   | C00019               | HMDB01185           | 133.30     | 11.90     | 134.34     | 16.83     | 160.52     | 9.10      |
| Adenylate Energy Charge                | No ID                | No ID               | 0.94       | 0.01      | 0.89       | 0.00      | 0.92       | 0.01      |
| Total Adenylate                        | No ID                | No ID               | 11,330.56  | 2,289.65  | 10,739.41  | 788.45    | 16,974.47  | 1,234.24  |
| Guanylate Energy Charge                | No ID                | No ID               | 0.94       | 0.01      | 0.89       | 0.01      | 0.91       | 0.01      |
| Total Guanylate                        | No ID                | No ID               | 1,671.41   | 347.54    | 1,669.74   | 215.98    | 2,580.57   | 146.21    |
| GSH/GSSG                               | No ID                | No ID               | 2.01       | 0.26      | 2.45       | 1.30      | 2.84       | 0.42      |
| Total Glutathione                      | No ID                | No ID               | 26,018.89  | 5,125.03  | 21,379.74  | 1,794.13  | 30,179.60  | 909.05    |
| NADPH/NADP+                            | No ID                | No ID               | 1.65       | 0.30      | 1.51       | 0.14      | 1.65       | 0.26      |
| NADH/NAD+                              | No ID                | No ID               | 0.07       | 0.00      | 0.10       | 0.02      | 0.09       | 0.01      |
| Glycerol 3-phosphate/DHAP              | No ID                | No ID               | 4.42       | 0.55      | 6.73       | 2.98      | 5.58       | 0.43      |
| Total Amino Acids                      | No ID                | No ID               | 286,713.34 | 41,196.39 | 326,630.76 | 37,708.28 | 431,415.95 | 21,713.65 |
| Total Essential Amino Acids            | No ID                | No ID               | 60,677.44  | 5,304.98  | 71,535.23  | 8,381.54  | 88,490.34  | 8,157.31  |
| Total Non-essential Amino Acids        | No ID                | No ID               | 226,035.89 | 35,967.44 | 255,095.53 | 29,326.84 | 342,925.61 | 13,570.74 |
| Total Glucogenic Amino Acids           | No ID                | No ID               | 279,794.21 | 40,230.04 | 317,709.03 | 36,494.88 | 420,566.30 | 20,541.52 |
| Total Ketogenic Amino Acids            | No ID                | No ID               | 47,801.48  | 4,405.49  | 56,304.47  | 6,312.20  | 70,077.42  | 6,592.51  |
| Total Branched Chain Amino Acids       | No ID                | No ID               | 28,227.25  | 2,572.99  | 32,944.82  | 4,706.78  | 39,546.52  | 3,788.88  |
| Total Aromatic Amino Acids             | No ID                | No ID               | 9,116.43   | 1,118.41  | 11,031.81  | 1,487.50  | 13,053.71  | 1,551.82  |
| Fischer's Ratio                        | No ID                | No ID               | 3.11       | 0.13      | 2.98       | 0.08      | 3.04       | 0.09      |
| Total Glu-related Amino Acids          | No ID                | No ID               | 168,130.67 | 23,871.71 | 195,259.30 | 22,861.19 | 256,532.59 | 11,405.81 |
| Total Pyruvate-related Amino Acids     | No ID                | No ID               | 65,206.04  | 9,446.71  | 76,731.37  | 9,873.75  | 106,754.79 | 4,777.52  |
| Total Acetyl CoA-related Amino Acids   | No ID                | No ID               | 20,568.71  | 2,302.79  | 24,779.29  | 3,075.80  | 29,921.45  | 2,902.23  |
| Total Fumarate-related Amino Acids     | No ID                | No ID               | 7,904.36   | 948.66    | 9,590.77   | 1,297.58  | 11,338.07  | 1,387.75  |
| Total Succinyl CoA-related Amino Acids | No ID                | No ID               | 25,183.29  | 2,177.54  | 29,441.38  | 3,921.32  | 35,193.58  | 3,147.02  |
| Total Oxaloacetate-related Amino Acids | No ID                | No ID               | 13,369.86  | 3,848.35  | 6,686.22   | 1,433.20  | 10,747.26  | 259.77    |
| Malate/Asp                             | No ID                | No ID               | 0.03       | 0.00      | 0.11       | 0.01      | 0.15       | 0.02      |
| G6P/R5P                                | No ID                | No ID               | 16.42      | 10.58     | 11.82      | 3.10      | 14.93      | 3.66      |

### Supplemental Table S3. Metabolomic data in iPSC-derived-myocytes.

Abbreviations: S.D., standard deviation; N.D., not detected.

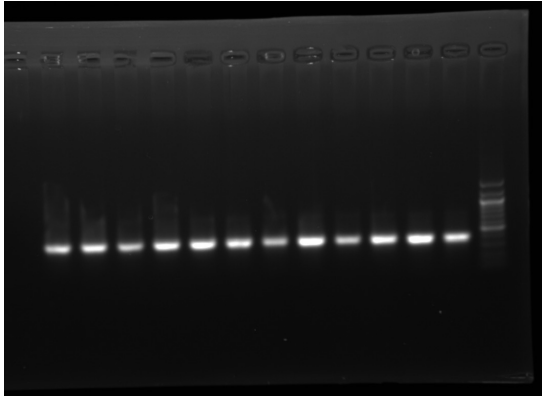

*Nanog*

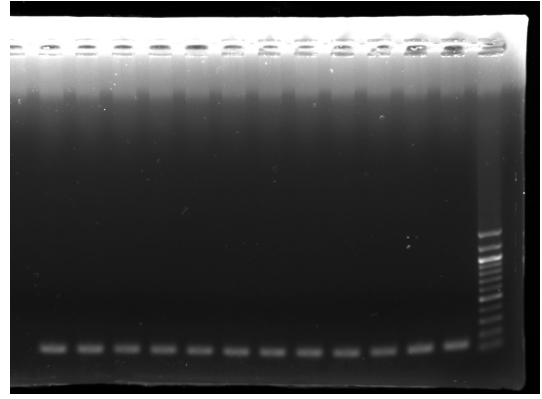

*Oct3/4*

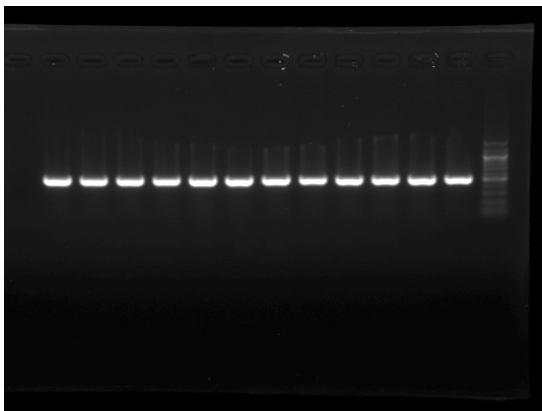

*Beta-actin*

**Full-length gels of Figure 1b.**

Lanes (from left to right): Ctr1a, b, Ctr2a, b, Ctr3a, b, Pom1a, b, Pom2a, b, Pom3a, b, Ladder.

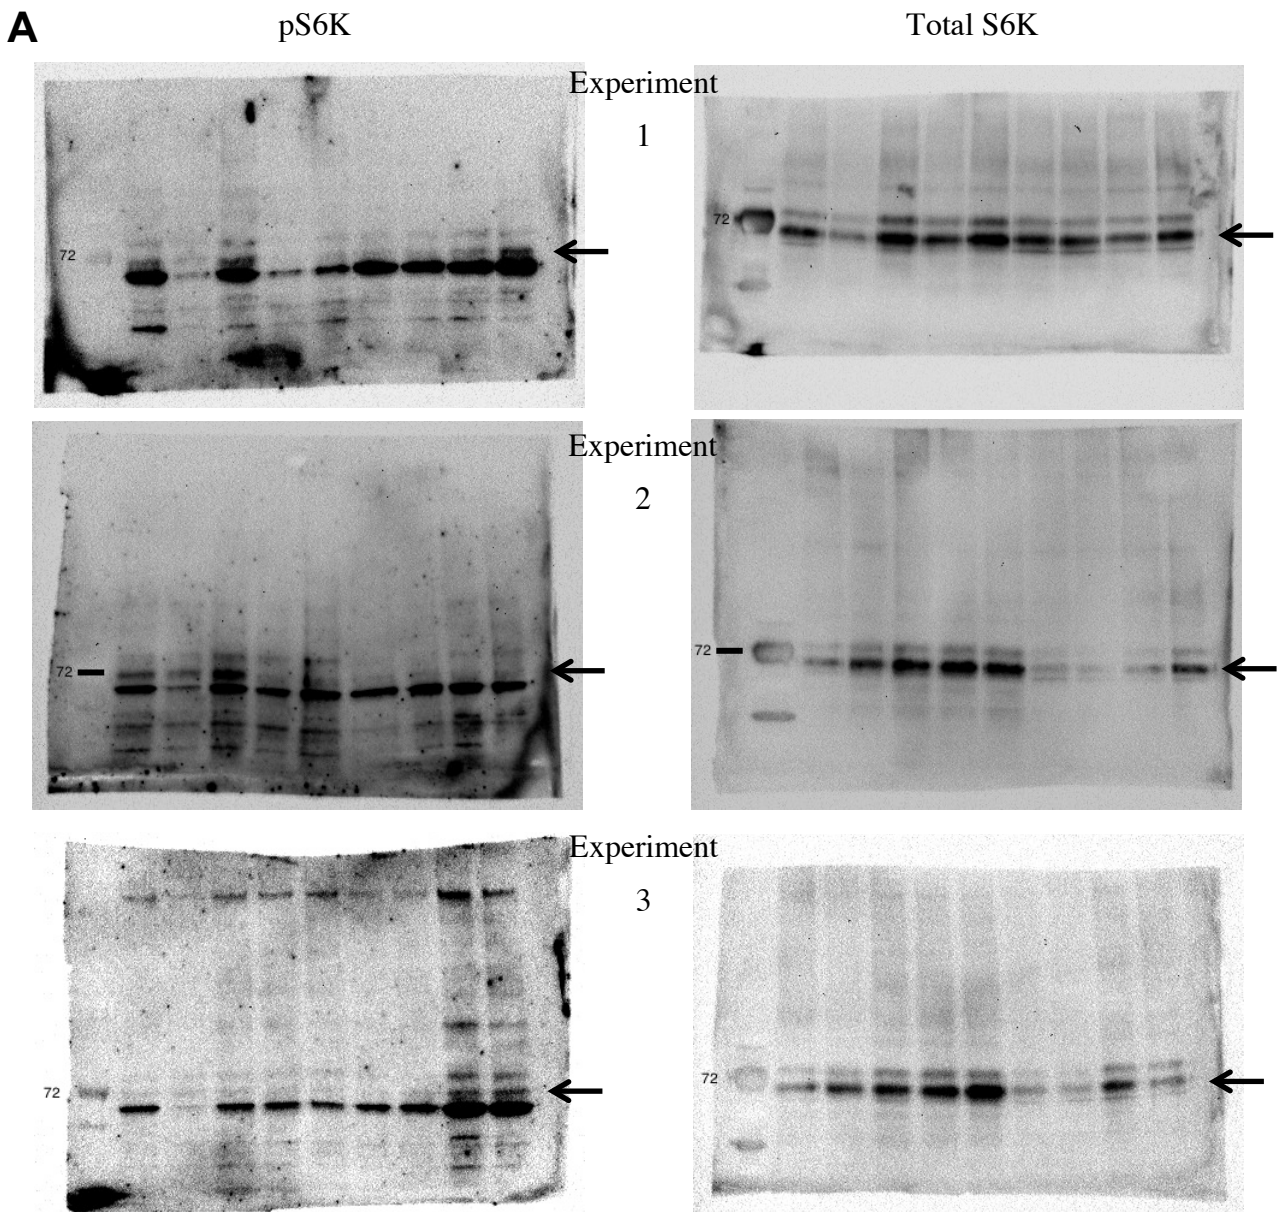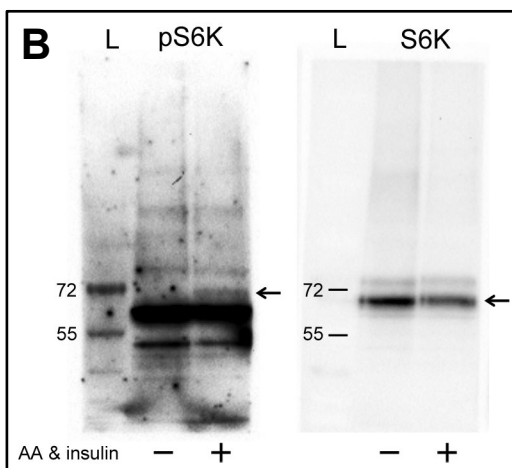

**(A) Full-length membranes of Figure 5a.** Left row,

pS6K; Right, total S6K. Lanes (from left to right):

Ladder, Ctr1a, Ctr2a, Ctr3b, Pom1b, Pom1b+rhGAA,

Pom2b, Pom2b+rhGAA, Pom3a, Pom3a+rhGAA.

**(B) Confirmation of pS6K and S6K bands.** Western blot

analysis for pS6K and total S6K without or with exposure

to amino acid and insulin in Ctr2a iPSC<sup>MyoD</sup>-derived

myocytes. Abbreviations: L, ladder; AA, amino acid.

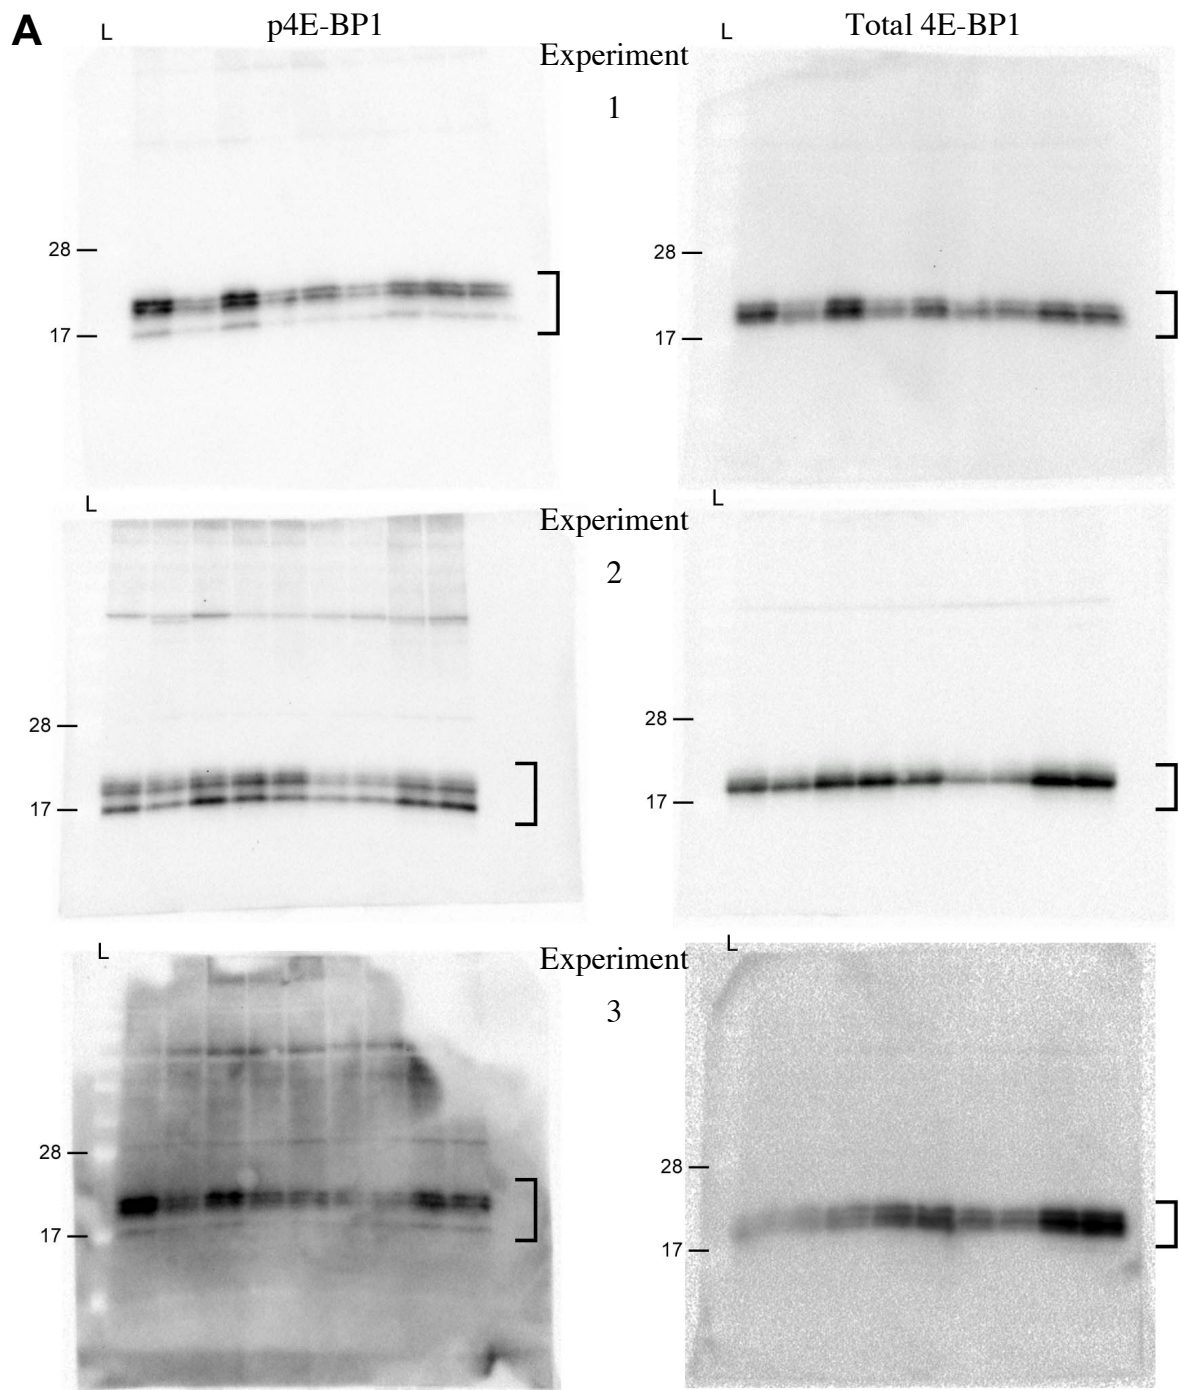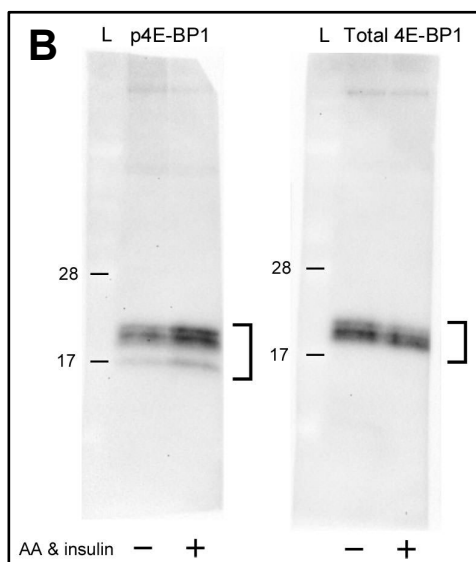

**(A) Full-length membranes of Figure 5c.** Left row, p4E-BP1; Right, total 4E-BP1. Lanes (from left to right): Ladder, Ctr1a, Ctr2a, Ctr3b, Pom1b, Pom1b+rhGAA, Pom2b, Pom2b+rhGAA, Pom3a, Pom3a+rhGAA.

**(B) Confirmation of p4E-BP1 and total 4E-BP1 bands.** Western blot analysis for p4E-BP1 and total 4E-BP1 without or with exposure to amino acid and insulin in Ctr2a iPSC<sup>MyoD</sup>-derived myocytes.

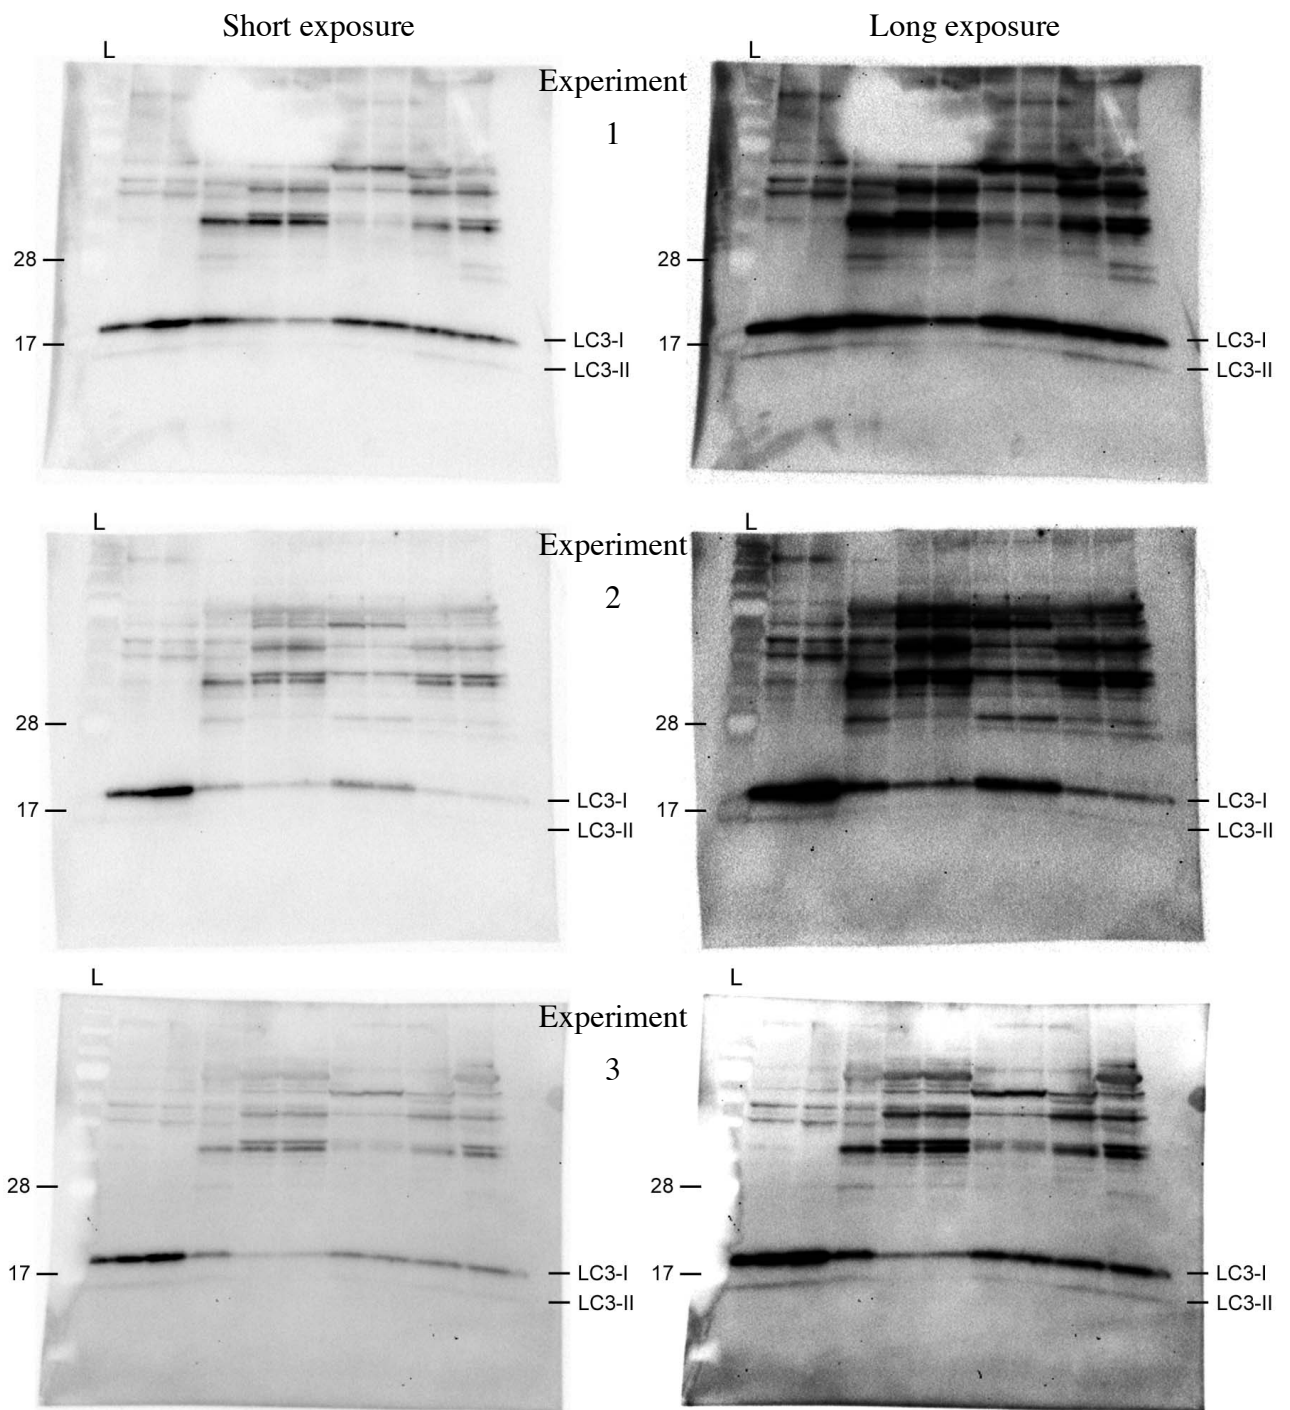

**Full-length membranes of Figure 6c.** Left row, short exposure; Right, long exposure. Lanes (from left to right): Ladder, Ctr1a, Ctr2a, Ctr3b, Pom1b, Pom1b+rhGAA, Pom2b, Pom2b+rhGAA, Pom3a, Pom3a+rhGAA.



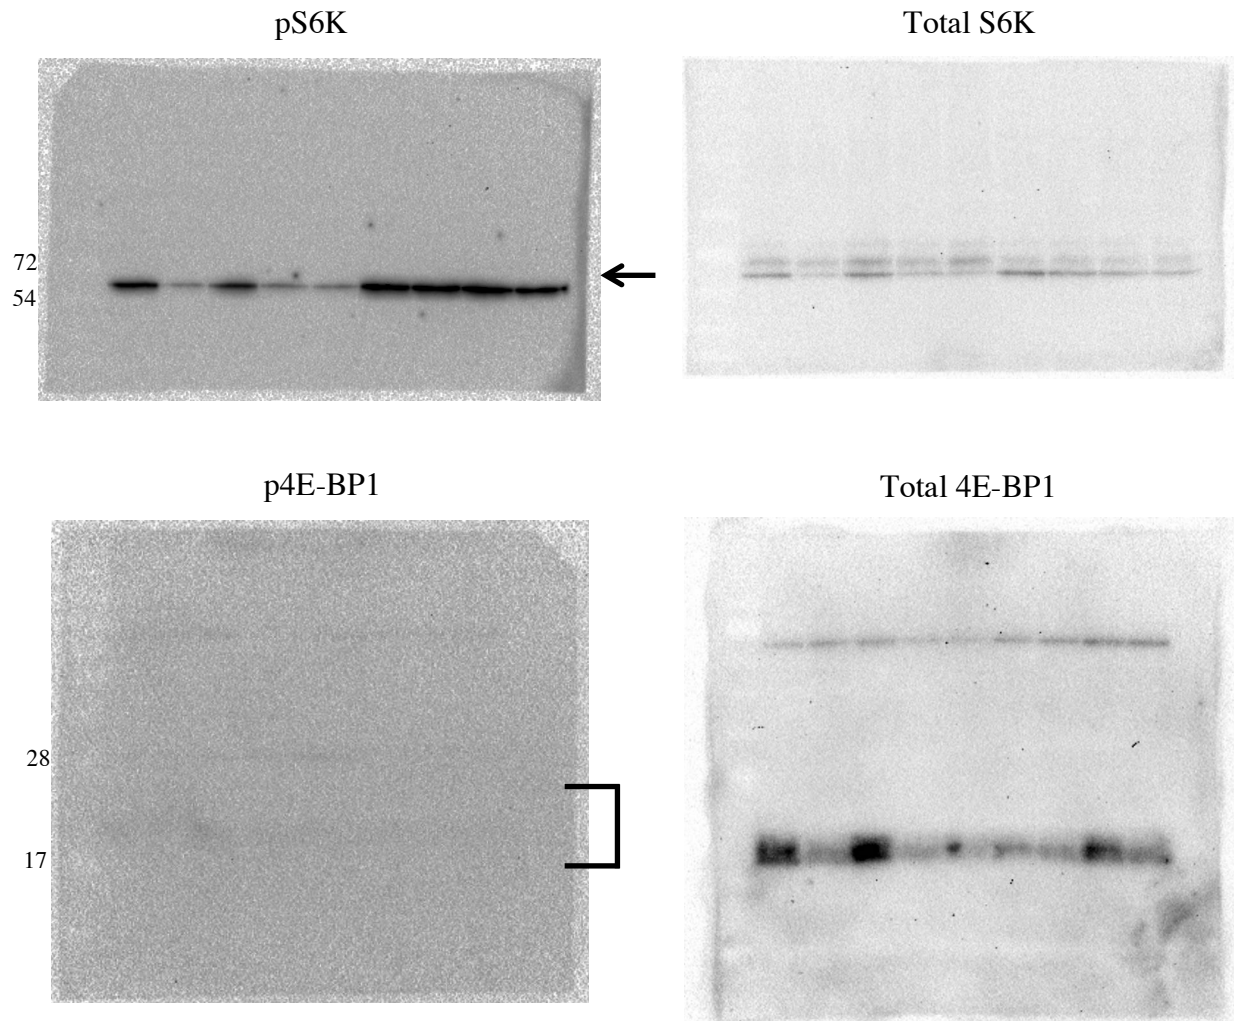

**Full-length membranes of Supplementary Figure S4.** Upper left panel, pS6K; Upper right, total S6K, Lower left, p4E-BP1; Lower right, total 4E-BP1. Lanes (from left to right): Ladder, Ctr1a, Ctr2a, Ctr3b, Pom1b, Pom1b+rhGAA, Pom2b, Pom2b+rhGAA, Pom3a, Pom3a+rhGAA.

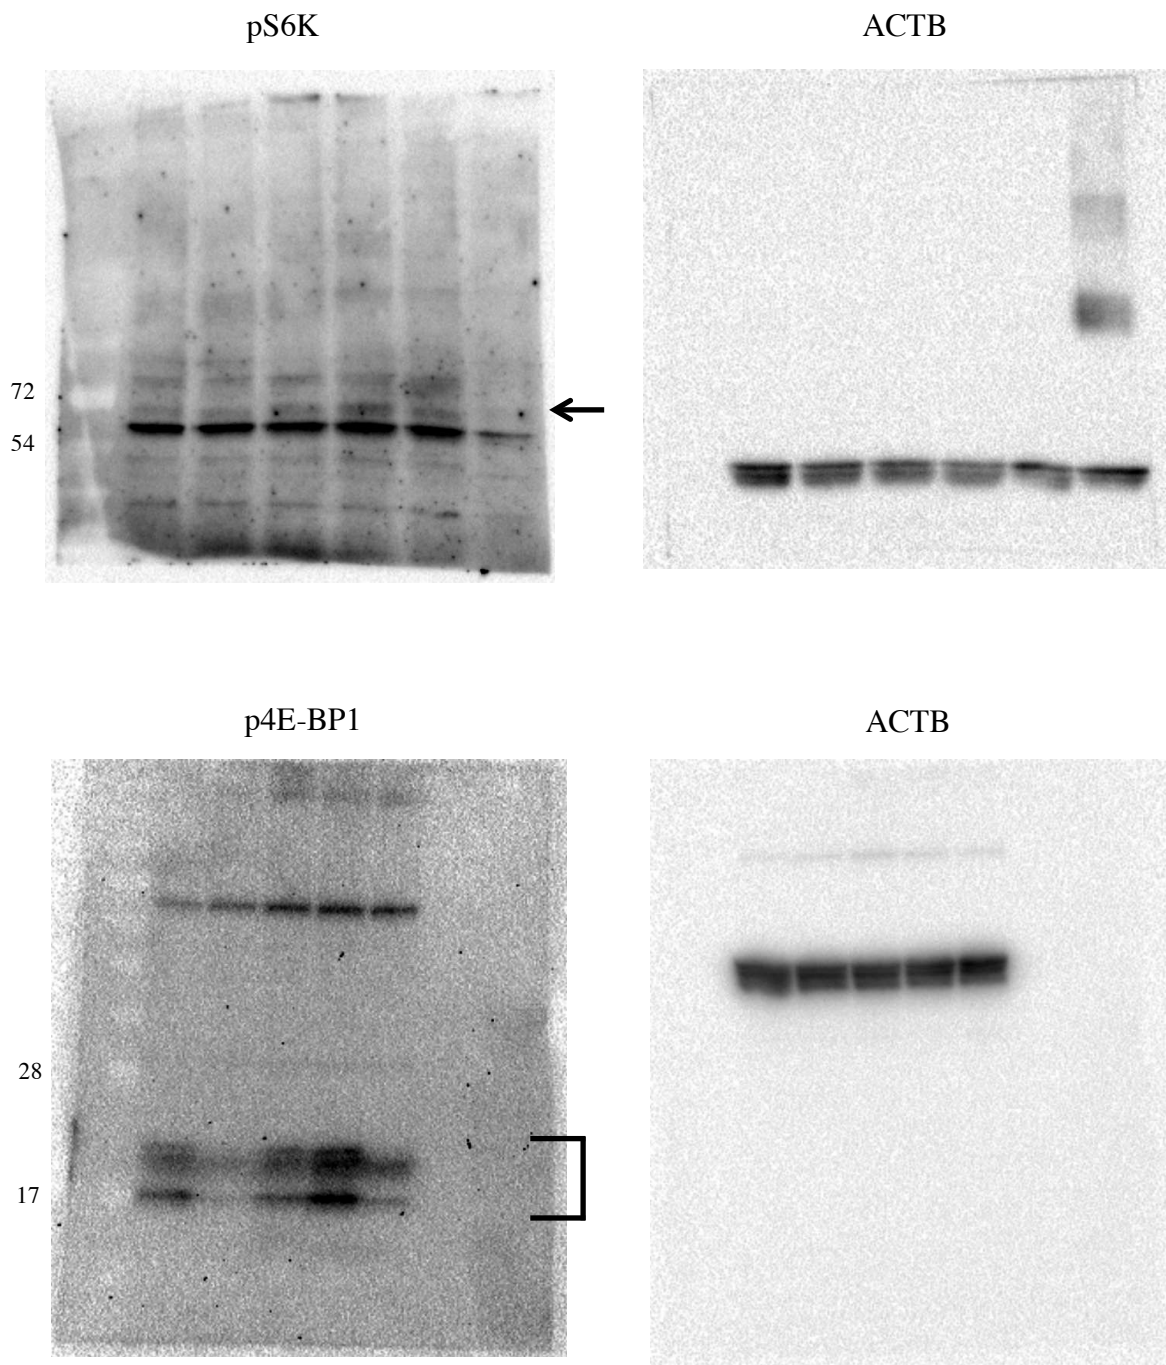

**Full-length membranes of Supplementary Figure S5.** Upper left panel, pS6K; Upper right, ACTB, Lower left, p4E-BP1; Lower right, ACTB. Lanes (from left to right): Ladder, Ctr2a, Ctr2a+Rapamycin, Pom1b, Pom1b+rhGAA, Pom1b+rhGAA+Rapamycin
